# Supplementary material for: Ultra-strong adhesive, self-healing and electroactive bio-based hydrogels for the on-demand fabrication of sandwich-inspired smart electronic sensing floors
Source: Royal Society of Chemistry journal article supplement (doi:10.1039/d2ta03782c), 2022-01-01
Supplement: d2ta03782c1.pdf [file d2ta03782c1.pdf]

# **Ultra-strong adhesive, self-healable and electroactive bio-based hydrogels for on-demand fabrication of sandwich-inspired smart electronic sensing floor**

Xiaoliang Zou <sup>a, c</sup>, Xuechuan Wang <sup>\*, a, c</sup>, Mengmeng Gou <sup>b, c</sup>, Ouyang Yue <sup>b, c</sup>, Zhongxue Bai <sup>a, c</sup>, Huijie Zhang <sup>a, c</sup>, Xinhua Liu <sup>\*, a, c</sup>

*a College of Bioresources Chemical and Materials Engineering, Shaanxi University of Science & Technology, Xi'an 710021, Shaanxi, China*

*b College of Chemistry and Chemical Engineering, Shaanxi University of Science & Technology, Xi'an 710021, Shaanxi, China*

*c National Demonstration Center for Experimental Light Chemistry Engineering Education, Shaanxi University of Science & Technology, Xi'an 710021, Shaanxi, China*

*\*Corresponding author(s): liuxinhua@sust.edu.cn; wangxc@sust.edu.cn*

## **1. Methods**

### **1.1 Equilibrium swelling ratio (ESR) test**

The equilibrium swelling ratio (ESR) was measured using a previously reported method <sup>[1]</sup>. Briefly, three replicates of each dried hydrogel were incubated in PBS at 37°C. The wet weight of the hydrogels was measured at different time points from the start of incubation. The swelling ratio was calculated as follows:

$$ESR (\%) = \frac{W_i - W_0}{W_0}$$

where  $W_i$  represented the weight of the swollen hydrogel at swelling equilibrium and  $W_0$  represented the weight of the dry hydrogel on day 0 in each case.

### **1.2 Tensile tests.**

Mechanical performance was investigated by using a Universal Testing Machine (UTM 2102) at room temperature on dumbbell specimen (35 mm × 2 mm × 1.5 mm) at 100 mm/min. Measurements on three specimens were conducted for each material and the results were reported as mean ± standard deviation.

## **2. Supplementary Figures**

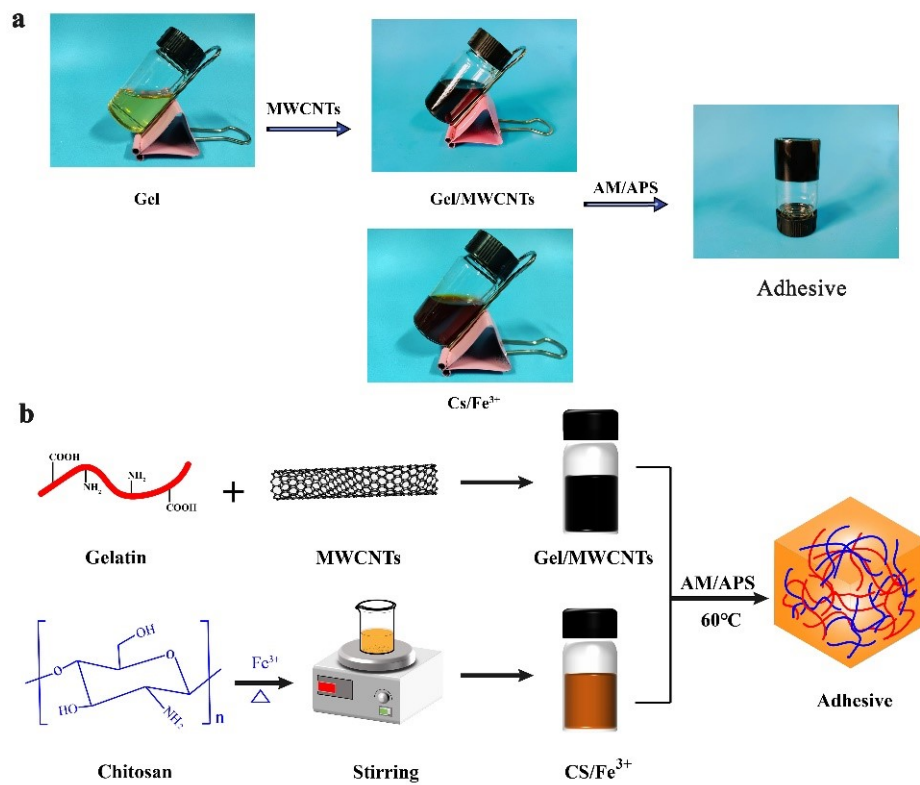

**Figure S1.** Preparation process of the CAM-Gels.

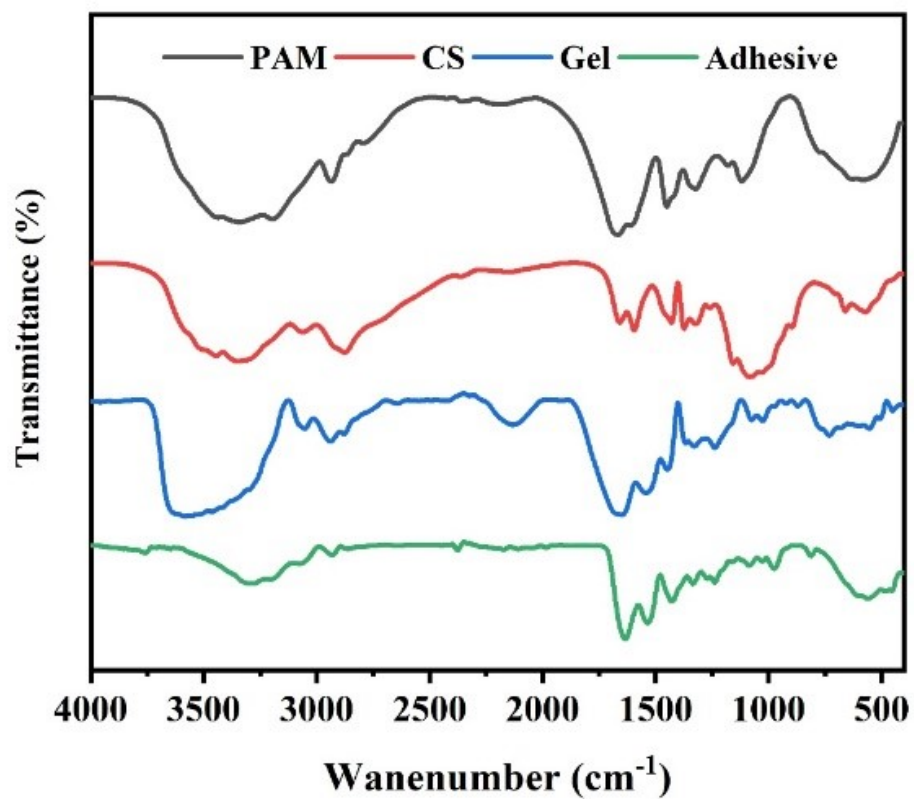

**Figure S2.** The FTIR spectra of Gel, CS, PAM and the CAM-Gel.

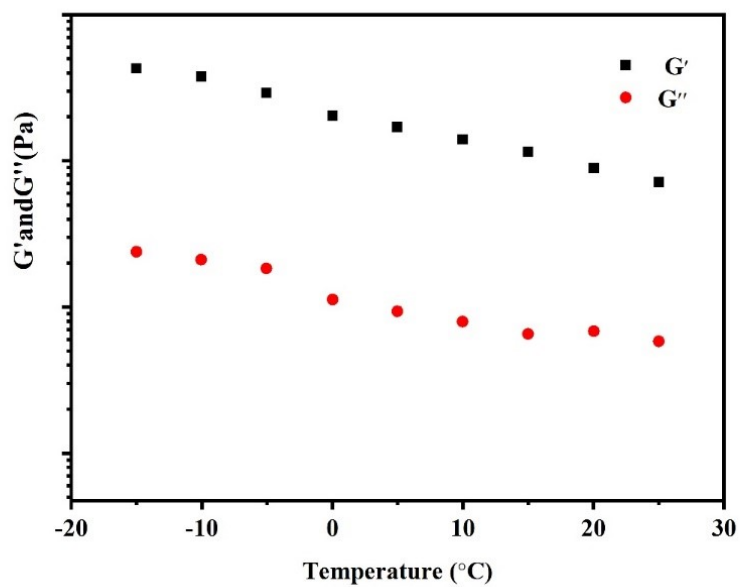

**Figure S3.** Temperature-dependent storage modulus  $G'$ , and loss modulus  $G''$  of the CAM-Gels.

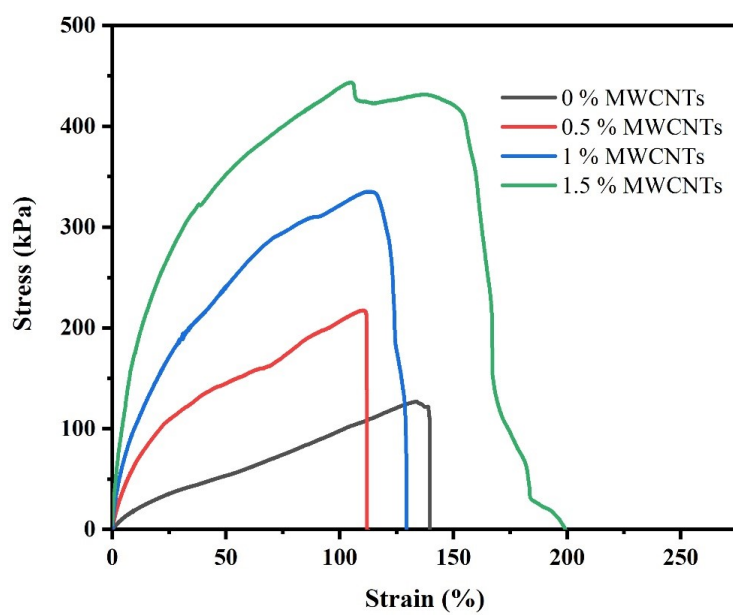

**Figure S4.** Stress-strain curves of the CAM-Gels.

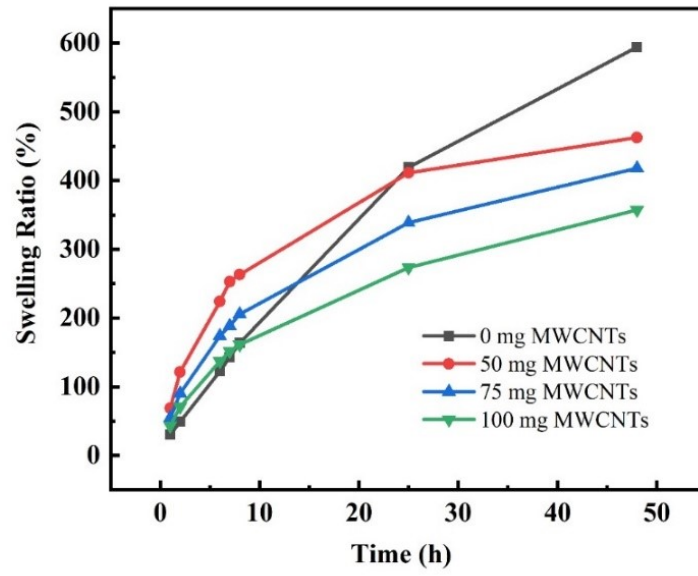

**Figure S5.** The Swelling behavior of the CAM-Gels.

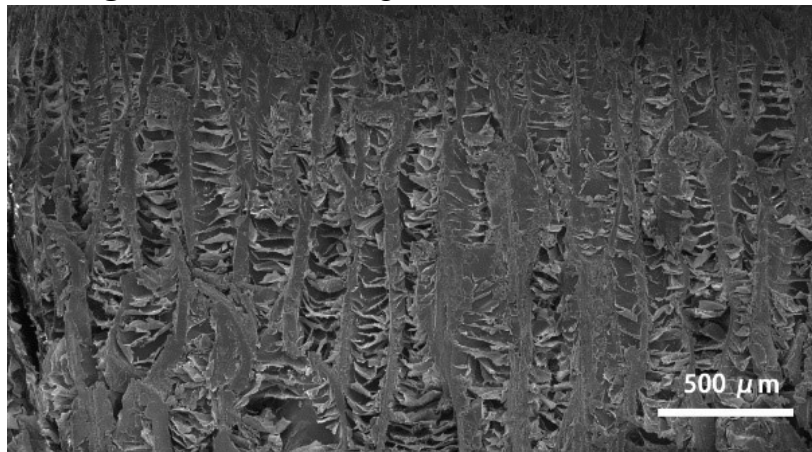

**Figure S6.** The SEM of gelatin

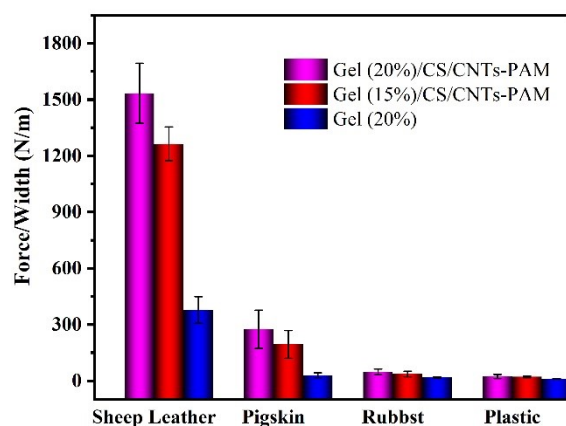

**Figure S7.** Comparison of peel strength of the CAM-Gels.

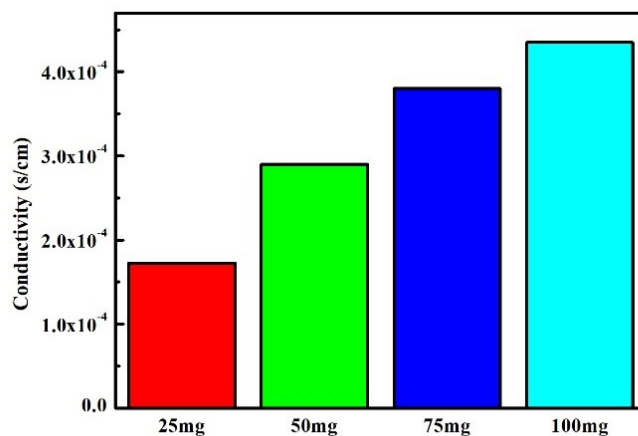

**Figure S8.** Conductivity of different MWCNTs in the CAM-Gels.

## References

- [1] D. Gan, T. Xu, W. Xing, M. Wang, J. Fang, K. Wang, X. Ge, C.W. Chan, F. Ren, H. Tan, Mussel-inspired dopamine oligomer intercalated tough and resilient gelatin methacryloyl (GelMA) hydrogels for cartilage regeneration, *J. Mat. Chem. B* 7(10) (2019) 1716-1725.
